# Supplementary material for: Development and comparative study of chemosynthesized antigen and mimotope-based immunoassays for class-specific analysis of O,O-dimethyl organophosphorus pesticides
Source: PubMed Central journal article supplement (PMC5118688; doi:10.1038/srep37640), 2016-11-22
Supplement: srep37640-s1.pdf [file srep37640-s1.pdf]

1 **Supplementary Information**

2

3 **Development and comparative study of chemosynthesized antigen and**  
4 **mimotope-based immunoassays for class-specific analysis of *O,O*-dimethyl**  
5 **organophosphorus pesticides**

6 Fengchun Zhao, Huimin Wang, Xiao Han, and Zhengyou Yang\*

7 Department of Microbiology, College of Life Science, Key Laboratory for Agriculture Microbiology,  
8 Shandong Agricultural University, Taian 271018, China.

9 \* To whom correspondence should be addressed. Email: zhyouyang@sdau.edu.cn

10 **Table S1. Yields and <sup>1</sup>H-NMR results of chemosynthesized haptens.**

| Hapten    | Yield  | <sup>1</sup> H-NMR (600 MHz, CDCl <sub>3</sub> )                                                                                                                  |
|-----------|--------|-------------------------------------------------------------------------------------------------------------------------------------------------------------------|
| Hapten 1  | 39.10% | δ 7.99-7.95 (m, 1H), 7.91-7.89 (m, 1H), 7.50-7.43 (m, 2H), 3.96-3.78 (m, 6H)                                                                                      |
| Hapten 2  | 71.20% | δ 7.98-7.94 (m, 1H), 7.92 (dd, J = 2.5, 1.8 Hz, 1H), 7.49-7.45 (m, 2H), 4.27 (dq, J = 10.0, 7.1 Hz, 4H), 1.39 (td, J = 7.1, 0.8 Hz, 6H)                           |
| Hapten 3  | 59.20% | δ 8.13 (d, J = 8.6 Hz, 2H), 7.30-7.27 (m, 2H), 3.88 (d, J = 13.9 Hz, 6H)                                                                                          |
| Hapten 4  | 78.10% | δ 8.12 (t, J = 5.5 Hz, 2H), 7.31-7.27 (m, 2H), 4.34-4.18 (m, 4H), 1.43-1.32 (m, 6H)                                                                               |
| Hapten 5  | 29.30% | δ 8.03 (d, J = 7.8 Hz, 1H), 7.59-7.52 (m, 1H), 7.34 (d, J = 8.3 Hz, 1H), 7.29 (t, J = 7.6 Hz, 1H), 3.89 (d, J = 13.9 Hz, 6H)                                      |
| Hapten 6  | 48.10% | δ 8.02 (d, J = 7.8 Hz, 1H), 7.60-7.54 (m, 1H), 7.40 (d, J = 8.3 Hz, 1H), 7.29 (t, J = 7.6 Hz, 1H), 4.29 (dq, J = 9.5, 7.1 Hz, 4H), 1.37 (dt, J = 7.9, 7.1 Hz, 6H) |
| Hapten 7  | 42.40% | δ 7.97 (d, J = 8.6 Hz, 1H), 7.89 (d, J = 1.7 Hz, 1H), 7.01 (d, J = 8.6 Hz, 1H), 4.00 – 3.85 (m, 9H)                                                               |
| Hapten 8  | 72.50% | δ 7.96 (dt, J = 13.8, 6.9 Hz, 1H), 7.92 (t, J = 1.9 Hz, 1H), 7.00 (d, J = 8.6 Hz, 1H), 4.29 (dq, J = 9.6, 7.1 Hz, 4H), 3.93 (s, 3H), 1.40 (t, J = 7.1 Hz, 6H)     |
| Hapten 9  | 39.80% | δ 8.06-7.76 (m, 2H), 7.33 (d, J = 7.9 Hz, 1H), 3.90 (d, J = 13.9 Hz, 6H), 2.40 (s, 3H)                                                                            |
| Hapten 10 | 68.20% | δ 7.95 (s, 1H), 7.85 (d, J = 7.9 Hz, 1H), 7.32 (d, J = 7.9 Hz, 1H), 4.28 (dq, J = 9.9, 7.1 Hz, 4H), 2.40 (s, 3H), 1.40 (td, J = 7.0, 0.8 Hz, 6H)                  |
| Hapten 11 | 37.10% | δ 7.86 (d, J = 1.7 Hz, 1H), 7.32-7.28 (m, 1H), 7.27 (d, J = 3.6 Hz, 1H), 3.88 (d, J = 13.8 Hz, 6H), 2.63 (s, 3H)                                                  |
| Hapten 12 | 69.30% | δ 7.88 (s, 1H), 7.30 (dt, J = 9.8, 4.9 Hz, 1H), 7.26 (t, J = 4.1 Hz, 1H), 4.35-4.15 (m, 4H), 2.63 (s, 3H), 1.46-1.32 (m, 6H)                                      |
| Hapten 13 | 52.10% | δ 7.74 (dd, J = 8.3, 1.5 Hz, 1H), 7.70 (d, J = 1.0 Hz, 1H), 7.29 (dd, J = 8.3, 1.7 Hz, 1H), 3.96-3.88 (m, 9H)                                                     |
| Hapten 14 | 81.40% | δ 7.80-7.64 (m, 2H), 7.32 (dd, J = 8.3, 1.7 Hz, 1H), 4.29 (dq, J = 9.7, 7.1 Hz, 4H), 3.93 (s, 3H), 1.45-.33 (m, 6H)                                               |
| Hapten 15 | 49.70% | δ 7.99 (s, 1H), 7.95 (dd, J = 8.5, 1.9 Hz, 1H), 7.32 (dd, J = 8.5, 1.2 Hz, 1H), 3.89 (d, J = 13.9 Hz, 6H), 2.37 (s, 3H)                                           |
| Hapten 16 | 79.40% | δ 7.98 (d, J = 6.0 Hz, 1H), 7.97-7.92 (m, 1H), 7.36 (d, J = 8.5 Hz, 1H), 4.27 (dq, J = 9.3, 7.1 Hz, 4H), 2.37 (s, 3H), 1.39 (td, J = 7.1, 0.5 Hz, 6H)             |
| Hapten 17 | 48.20% | δ 8.09 (d, J = 8.6 Hz, 1H), 7.12-7.09 (m, 1H), 7.08 (s, 1H), 3.88 (d, J = 13.9 Hz, 6H), 2.66 (s, 3H)                                                              |
| Hapten 18 | 75.60% | δ 8.10 (t, J = 7.6 Hz, 1H), 7.11 (d, J = 9.1 Hz, 1H), 7.09 (s, 1H), 4.34 -4.18 (m, 4H), 2.66 (s, 3H), 1.38 (td, J = 7.1, 0.6 Hz, 6H)                              |
| Hapten 19 | 25.40% | δ 10.74 (s, 1H), 7.94 (d, J = 8.0 Hz, 1H), 7.14 (s, 1H), 7.10 (d, J = 8.1 Hz, 1H), 3.91 (d, J = 13.9 Hz, 6H), 2.42 (s, 3H)                                        |
| Hapten 20 | 37.80% | δ 7.91 (d, J = 8.0 Hz, 1H), 7.19 (s, 1H), 7.08 (d, J = 8.0 Hz, 1H), 4.38-4.19 (m, 4H), 2.41 (s, 3H), 1.38 (td, J = 7.1, 0.8 Hz, 6H)                               |

12 **Table S2. Comparison of the IC<sub>50</sub> values (ng/mL) of immunoassays for *O,O*-dimethyl OPs**  
 13 **developed in this study and in the literatures.** <sup>a</sup>*O,O*-dimethyl OPs. <sup>b</sup>*O,O*-diethyl OPs. <sup>c</sup>OPs  
 14 not used in this study.

| No. | Analytes                         | This study (mAb3C9)                                                               | Hua et al. <sup>11</sup>                                                          | Liang et al. <sup>9</sup>                                                           | Liu et al. <sup>10</sup>                                                            |
|-----|----------------------------------|-----------------------------------------------------------------------------------|-----------------------------------------------------------------------------------|-------------------------------------------------------------------------------------|-------------------------------------------------------------------------------------|
|     |                                  | 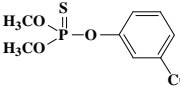 |  |  |  |
| 1   | Parathion-methyl <sup>a</sup>    | 4.7                                                                               | 3.7                                                                               | 438.9                                                                               | 580                                                                                 |
| 2   | Famphur <sup>a</sup>             | 1.3                                                                               | 58215.7                                                                           | -                                                                                   | -                                                                                   |
| 3   | Phosmet <sup>a</sup>             | 1.4                                                                               | -                                                                                 | 159.7                                                                               | -                                                                                   |
| 4   | Azinphos-methyl <sup>a</sup>     | 1.5                                                                               | >100000                                                                           | -                                                                                   | -                                                                                   |
| 5   | Cyanophos <sup>a</sup>           | 2.9                                                                               | 20.3                                                                              | -                                                                                   | -                                                                                   |
| 6   | Methidathion <sup>a</sup>        | 3.1                                                                               | -                                                                                 | 191.7                                                                               | -                                                                                   |
| 7   | Chlorpyrifos-methyl <sup>a</sup> | 3.9                                                                               | >100000                                                                           | -                                                                                   | 810                                                                                 |
| 8   | Fenitrothion <sup>a</sup>        | 4.4                                                                               | 8.9                                                                               | 324                                                                                 | 3540                                                                                |
| 9   | Tolclofos-methyl <sup>a</sup>    | 6.6                                                                               | >100000                                                                           | -                                                                                   | 1100                                                                                |
| 10  | Fenthion <sup>a</sup>            | 14.5                                                                              | >100000                                                                           | 788.9                                                                               | 1210                                                                                |
| 11  | Fenchlorphos <sup>a</sup>        | 44.3                                                                              | -                                                                                 | -                                                                                   | -                                                                                   |
| 12  | Tetrachlorvinphos <sup>a</sup>   | 54.4                                                                              | -                                                                                 | -                                                                                   | -                                                                                   |
| 13  | Bromophos-methyl <sup>a</sup>    | 75.5                                                                              | -                                                                                 | -                                                                                   | -                                                                                   |
| 14  | Pirimiphos-methyl <sup>a</sup>   | 77.4                                                                              | -                                                                                 | -                                                                                   | -                                                                                   |
| 15  | Azinphos-ethyl <sup>b</sup>      | 95.3                                                                              | -                                                                                 | -                                                                                   | -                                                                                   |
| 16  | Dichlorvos <sup>a</sup>          | 132.1                                                                             | >100000                                                                           | -                                                                                   | -                                                                                   |
| 17  | Dimethoate <sup>a</sup>          | 170.3                                                                             | >100000                                                                           | 28.9                                                                                | -                                                                                   |
| 18  | Monocrotophos <sup>a</sup>       | 179.1                                                                             | -                                                                                 | -                                                                                   | -                                                                                   |
| 19  | Paraoxon-methyl <sup>a</sup>     | 231.0                                                                             | 118.7                                                                             | -                                                                                   | -                                                                                   |
| 20  | Diazinon <sup>b</sup>            | 1812.4                                                                            | -                                                                                 | -                                                                                   | -                                                                                   |
| 21  | Parathion <sup>b</sup>           | 2412.5                                                                            | 11.3                                                                              | >1000                                                                               | -                                                                                   |
| 22  | Phoxim <sup>b</sup>              | 2652.4                                                                            | >100000                                                                           | -                                                                                   | -                                                                                   |
| 23  | Triazophos <sup>b</sup>          | 2786.5                                                                            | >100000                                                                           | -                                                                                   | -                                                                                   |
| 24  | Quinalphos <sup>b</sup>          | 2824.3                                                                            | -                                                                                 | -                                                                                   | -                                                                                   |
| 25  | EPN <sup>b</sup>                 | - <sup>c</sup>                                                                    | 18.3                                                                              | -                                                                                   | -                                                                                   |
| 26  | Paraoxon-ethyl <sup>b</sup>      | -                                                                                 | 162.2                                                                             | -                                                                                   | -                                                                                   |
| 27  | Malathion <sup>a</sup>           | -                                                                                 | >100000                                                                           | 30.1                                                                                | 10470                                                                               |
| 28  | Isochlorthion <sup>a</sup>       | -                                                                                 | 576.6                                                                             | -                                                                                   | -                                                                                   |

15

16 **Table S3. Sensitivity and selectivity of the mAb4D11-based dcELISA for OPs.** <sup>a</sup>IC<sub>50</sub> values  
 17 are in units of ng/mL. <sup>b</sup>CR (%) was calculated by the equation [(IC<sub>50</sub> of parathion/IC<sub>50</sub> of  
 18 analyte)] × 100. <sup>c</sup>No detection.

| No. | Analytes            | IC <sub>50</sub> <sup>a</sup> | CR(%) <sup>b</sup> | LOD <sup>a</sup> |
|-----|---------------------|-------------------------------|--------------------|------------------|
| 1   | Parathion-methyl    | 14.5                          | 100.0              | 2.0              |
| 2   | Fenthion            | 4.8                           | 303.6              | 0.9              |
| 3   | Fenitrothion        | 8.1                           | 180.2              | 1.2              |
| 4   | Cyanophos           | 17.6                          | 82.5               | 2.3              |
| 5   | Chlorpyrifos-methyl | 24.4                          | 59.4               | 5.7              |
| 6   | Tolclofos-methyl    | 31.4                          | 46.2               | 9.5              |
| 7   | Fenclorphos         | 55.0                          | 26.4               | 13.3             |
| 8   | Pirimiphos-methyl   | 62.1                          | 23.4               | 9.1              |
| 9   | Bromophos-methyl    | 124.6                         | 11.6               | 31.4             |
| 10  | Parathion           | 163.6                         | 8.9                | 17.5             |
| 11  | Quinalphos          | 184.2                         | 7.9                | 32.5             |
| 12  | Phoxim              | 244.1                         | 5.9                | 49.5             |
| 13  | Triazophos          | 279.7                         | 5.2                | 59.9             |
| 14  | Diazinon            | 288.3                         | 5.0                | 73.2             |
| 15  | Famphur             | 346.4                         | 4.2                | 80.3             |
| 16  | Dichlorvos          | 1827.9                        | 0.8                | 437.2            |
| 17  | Tetrachlorvinphos   | 2431.3                        | 0.6                | 536.3            |
| 18  | Paraoxon-methyl     | 2643.3                        | 0.5                | 512.5            |
| 19  | Monocrotophos       | 2914.5                        | 0.5                | 594.3            |
| 20  | Azinphos-methyl     | >5000                         | <0.3               | ND <sup>c</sup>  |
| 21  | Azinphos-ethyl      | >5000                         | <0.3               | ND               |
| 22  | Dimethoate          | >5000                         | <0.3               | ND               |
| 23  | Phosmet             | >5000                         | <0.3               | ND               |
| 24  | Methidathion        | >5000                         | <0.3               | ND               |

19

20 **Table S4. Mimotope sequences and IC<sub>50</sub> of parathion-methyl determined by phage-**  
 21 **ELISA.**

| Mimotope name         | Mimotope sequence                      | $A_{\max}$  | IC <sub>50</sub> (ng/mL) |
|-----------------------|----------------------------------------|-------------|--------------------------|
| M3 (M7, M12)          | C L Y H P W N N C                      | 1.41        | 20.1                     |
| M4 (M8, M10, M12)     | C L <u>G</u> T T P <u>F</u> F C        | 1.52        | 16.9                     |
| <b>M20 (M21, M25)</b> | <b>C T <u>G</u> T T <u>P</u> F Y C</b> | <b>1.64</b> | <b>12.6</b>              |
| M32 (M35, M37)        | C R <u>G</u> S M P <u>F</u> W C        | 1.38        | 18.4                     |
| M39 (M42)             | C M A R Y M S A C                      | 1.59        | 13.2                     |

22

23 **Table S5. Recoveries of OPs from spiked samples determined by the chemosynthesized**  
 24 **antigen-based dcELISA (n=3).** <sup>a</sup>The OPs in spiked samples are in unit of ng/g. <sup>b</sup>R is the  
 25 average recovery.

| Samples  | Analyte             | Azinphos-methyl |       | Fenitrothion |      | Parathion-methyl |       |
|----------|---------------------|-----------------|-------|--------------|------|------------------|-------|
|          | Spiked <sup>a</sup> | 5               | 10    | 10           | 20   | 10               | 20    |
| Apple    | R (%)               | 95.6            | 102.5 | 97.7         | 91.8 | 90.3             | 108.2 |
|          | CV (%)              | 4.5             | 7.6   | 10.2         | 8.9  | 14.1             | 8.2   |
| Cabbage  | R (%)               | 93.9            | 97.8  | 101.2        | 98.2 | 112.8            | 101.7 |
|          | CV (%)              | 13.2            | 3.5   | 9.3          | 6.8  | 5.5              | 4.8   |
| cucumber | R (%)               | 101.7           | 108.5 | 101.8        | 94.7 | 106.2            | 101.3 |
|          | CV (%)              | 3.9             | 6.5   | 8.7          | 10.1 | 6.4              | 5.8   |

26

27 **Table S6. Recoveries of OPs from spiked samples determined by the mimotope-based**  
 28 **dcELISA (n=3).** <sup>a</sup>The OPs in spiked samples are in unit of ng/g. <sup>b</sup>R is the average recovery.

| Samples  | Analyte             | Azinphos-methyl |       | Fenitrothion |      | Parathion-methyl |       |
|----------|---------------------|-----------------|-------|--------------|------|------------------|-------|
|          | Spiked <sup>a</sup> | 5               | 10    | 10           | 20   | 10               | 20    |
| Apple    | R (%)               | 92.4            | 102.5 | 97.7         | 94.8 | 93.3             | 108.2 |
|          | CV (%)              | 4.7             | 4.9   | 6.6          | 9.8  | 6.7              | 4.3   |
| Cabbage  | R (%)               | 93.9            | 97.8  | 101.2        | 98.2 | 121.5            | 101.7 |
|          | CV (%)              | 10.4            | 6.2   | 13.6         | 7.7  | 3.8              | 5.6   |
| cucumber | R (%)               | 101.7           | 108.5 | 101.8        | 94.7 | 106.2            | 101.3 |
|          | CV (%)              | 8.2             | 6.7   | 9.4          | 11.2 | 2.9              | 3.9   |

29

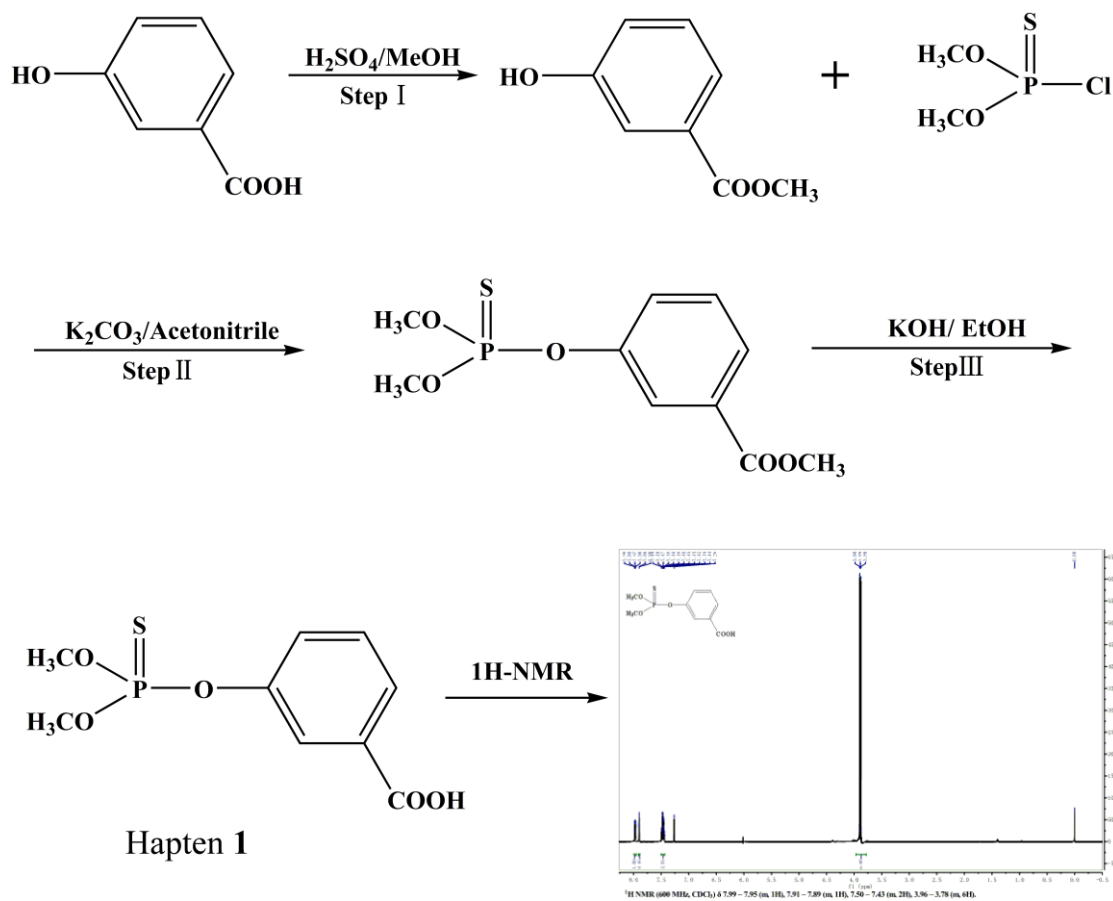

30 **Figure S1.** Synthetic route of hapten **1**.



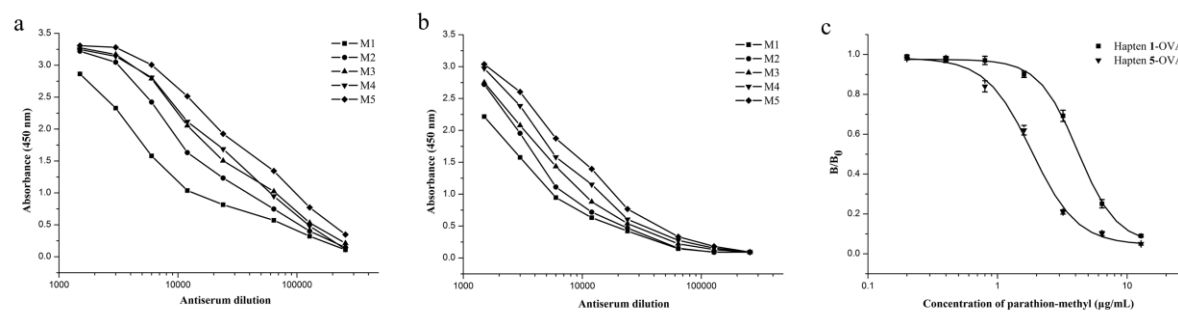

31 **Figure S2. Detection of mice antisera after three times immunization.** (a) Antisera titers determination  
 32 using hapten 1-OVA (10 µg/mL) as coating antigen. (b) antisera titers determination using hapten 5-OVA  
 33 (10 µg/mL) as coating antigen. (c) B/B<sub>0</sub> values of antiserum M5 against parathion-methyl.

34

35  
36  
37  
38  
39  
40  
41  
42  
43  
44  
45  
46  
47  
48  
49

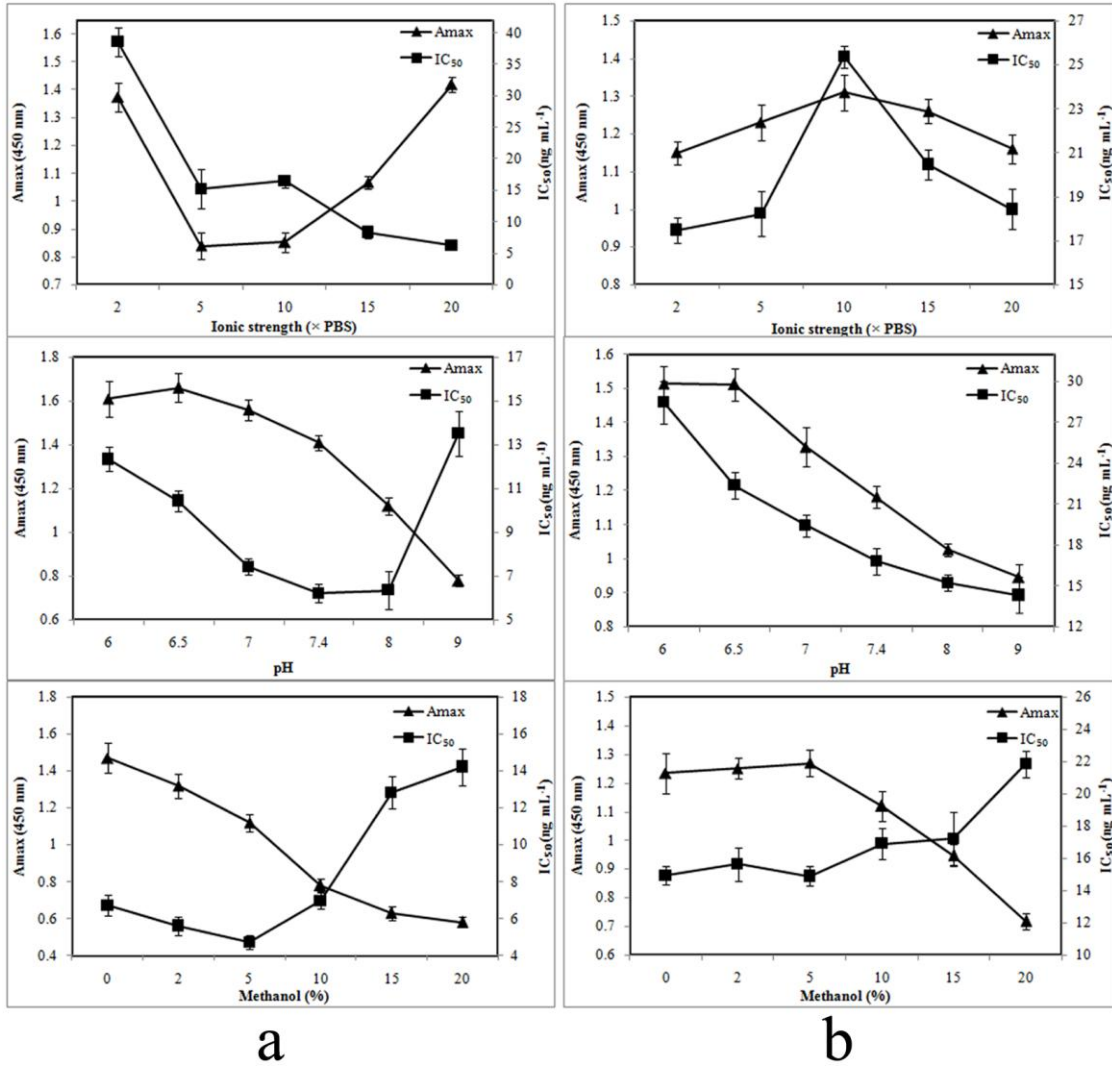

Figure S3. Effect of ionic strength, pH, and concentration of methanol on the dcELISAs based on mAb3C9 (a) and mAb4D11 (b). Parathion-methyl was used as analyte. Each point represents the average of three replicates.

50

51

52

53

54

55

56

57

58

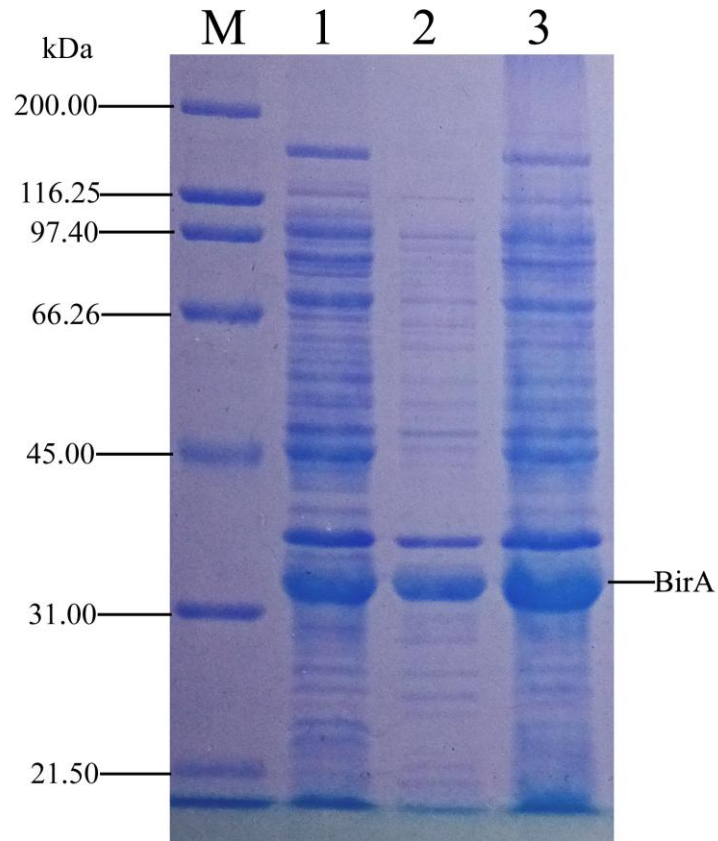

59 **Figure S4. Characterization of BirA by SDS-PAGE.** Lane M: protein standards, lane 1: cell  
60 lysate supernatant, lane 2: cell lysate pellet, lane 3: total cell lysate.

61

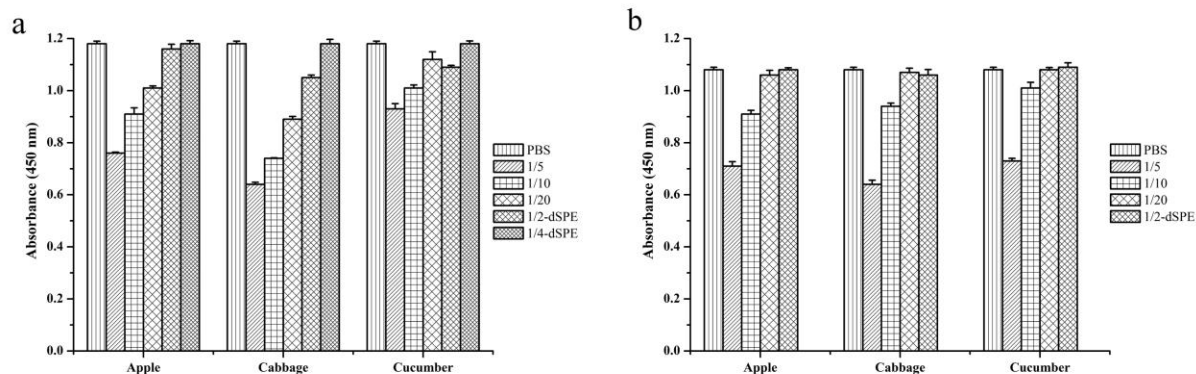

62 **Figure S5. Matrix effects of purified and unpurified apple, cabbage and cucumber**  
 63 **samples analyzed by chemosynthesized antigen-based dcELISA (a) and mimotope-based**  
 64 **dcELISA (b).** PBS was used as control. Unpurified sample extracts were diluted 5, 10 and 20  
 65 times before dcELISA analyses. Sample extracts purified by dSPE-based QuEChERS were  
 66 diluted 2 and 4 times before chemosynthesized antigen-based dcELISA analyses, and 2 times  
 67 before mimotope-based dcELISA analyses(n=4).
